# Supplementary material for: Chitosan-Coated PLGA Nanoparticles Encapsulating Triamcinolone Acetonide as a Potential Candidate for Sustained Ocular Drug Delivery
Source: MDPI journal article supplement (doi:10.3390/pharmaceutics13101590), 2021-09-30
Supplement: s1 [file s1]

# Supplementary Materials: Chitosan-Coated PLGA Nanoparticles Encapsulating Triamcinolone Acetonide as a Potential Candidate for Sustained Ocular Drug Delivery

Madhuri Dandamudi, Peter McLoughlin, Gautam Behl, Sweta Rani, Lee Coffey, Anuj Chauhan, David Kent and Laurence Fitzhenry

**Table S1.** Design of experiments generated by Box-Behnken design statistical design in Minitab software.

| Run Order | PLGA (mg/mL) | Poloxamer % (w/v) | Chitosan % (w/v) |
|-----------|--------------|-------------------|------------------|
| 1         | 4            | 2                 | 2                |
| 2         | 4.5          | 1.5               | 2                |
| 3         | 3.5          | 1.5               | 2                |
| 4         | 3.5          | 1.5               | 2                |
| 5         | 3.5          | 2                 | 1.5              |
| 6         | 4            | 1                 | 1                |
| 7         | 3.5          | 1.5               | 1                |
| 8         | 4.5          | 1                 | 1.5              |
| 9         | 4.5          | 2                 | 1.5              |
| 10        | 3.5          | 1.5               | 1                |
| 11        | 4.5          | 1                 | 1.5              |
| 12        | 4            | 1.5               | 1.5              |
| 13        | 4.5          | 2                 | 1.5              |
| 14        | 3.5          | 1                 | 1.5              |
| 15        | 4.5          | 1.5               | 1                |
| 16        | 4            | 2                 | 1                |
| 17        | 4            | 2                 | 1                |
| 18        | 3.5          | 1                 | 1.5              |
| 19        | 4            | 1.5               | 1.5              |
| 20        | 4            | 1                 | 2                |
| 21        | 4            | 1.5               | 1.5              |
| 22        | 4            | 2                 | 2                |
| 23        | 4            | 1                 | 1                |
| 24        | 4.5          | 1.5               | 2                |
| 25        | 3.5          | 2                 | 1.5              |
| 26        | 4            | 1.5               | 1.5              |
| 27        | 4            | 1.5               | 1.5              |
| 28        | 4            | 1.5               | 1.5              |
| 29        | 4            | 1                 | 2                |
| 30        | 4.5          | 1.5               | 1                |

**Table S2.** Investigated values of responses for the prepared nanoparticles using Box-Behnken design.

| Run Order | PLGA (mg/mL) | Poloxamer %<br>(w/v) | Chitosan %<br>(w/v) | Particle size<br>(nm) | PDI    | Zeta Potential<br>(mV) | % Encapsulation<br>Efficiency |
|-----------|--------------|----------------------|---------------------|-----------------------|--------|------------------------|-------------------------------|
| 1         | 4.0          | 2.0                  | 2.0                 | 340.00                | 0.0910 | 10.50                  | 34.07                         |
| 2         | 4.5          | 1.5                  | 2.0                 | 420.00                | 0.0640 | 28.60                  | 34.34                         |
| 3         | 3.5          | 1.5                  | 2.0                 | 333.00                | 0.0420 | 37.80                  | 36.56                         |
| 4         | 3.5          | 1.5                  | 2.0                 | 410.00                | 0.4700 | 31.20                  | 36.90                         |
| 5         | 3.5          | 2.0                  | 1.5                 | 569.00                | 0.1021 | -46.40                 | 51.92                         |
| 6         | 4.0          | 1.0                  | 1.0                 | 340.00                | 0.1180 | 52.54                  | 48.95                         |
| 7         | 3.5          | 1.5                  | 1.0                 | 819.00                | 0.1200 | 46.90                  | 28.79                         |
| 8         | 4.5          | 1.0                  | 1.5                 | 414.00                | 0.1450 | 22.70                  | 53.40                         |
| 9         | 4.5          | 2.0                  | 1.5                 | 337.00                | 0.1170 | -42.70                 | 50.95                         |
| 10        | 3.5          | 1.5                  | 1.0                 | 474.36                | 0.1710 | 29.40                  | 33.48                         |
| 11        | 4.5          | 1.0                  | 1.5                 | 464.00                | 0.0970 | 25.60                  | 56.38                         |
| 12        | 4.0          | 1.5                  | 1.5                 | 349.00                | 0.1140 | 20.40                  | 53.43                         |
| 13        | 4.5          | 2.0                  | 1.5                 | 380.00                | 0.2440 | -38.20                 | 52.15                         |
| 14        | 3.5          | 1.0                  | 1.5                 | 286.90                | 0.1090 | 19.60                  | 57.79                         |
| 15        | 4.5          | 1.5                  | 1.0                 | 410.00                | 0.1570 | 36.89                  | 30.94                         |
| 16        | 4.0          | 2.0                  | 1.0                 | 350.00                | 0.2360 | -35.60                 | 37.46                         |
| 17        | 4.0          | 2.0                  | 1.0                 | 390.00                | 0.1210 | -28.40                 | 34.37                         |
| 18        | 3.5          | 1.0                  | 1.5                 | 383.00                | 0.0710 | 33.70                  | 52.56                         |
| 19        | 4.0          | 1.5                  | 1.5                 | 465.00                | 0.1180 | 25.52                  | 50.67                         |
| 20        | 4.0          | 1.0                  | 2.0                 | 480.00                | 0.2830 | 57.70                  | 33.41                         |
| 21        | 4.0          | 1.5                  | 1.5                 | 390.00                | 0.0840 | 31.50                  | 56.26                         |
| 22        | 4.0          | 2.0                  | 2.0                 | 370.70                | 0.2203 | 18.20                  | 31.98                         |
| 23        | 4.0          | 1.0                  | 1.0                 | 525.00                | 0.1340 | 48.80                  | 49.51                         |
| 24        | 4.5          | 1.5                  | 2.0                 | 372.77                | 0.0884 | 18.90                  | 31.16                         |
| 25        | 3.5          | 2.0                  | 1.5                 | 420.00                | 0.1120 | -33.20                 | 35.28                         |
| 26        | 4.0          | 1.5                  | 1.5                 | 268.70                | 0.1870 | 29.30                  | 41.07                         |
| 27        | 4.0          | 1.5                  | 1.5                 | 441.00                | 0.0450 | 30.60                  | 39.09                         |
| 28        | 4.0          | 1.5                  | 1.5                 | 471.00                | 0.4120 | 28.60                  | 38.21                         |
| 29        | 4.0          | 1.0                  | 2.0                 | 427.00                | 0.1210 | 33.40                  | 27.62                         |
| 30        | 4.5          | 1.5                  | 1.0                 | 361.00                | 0.1650 | 42.70                  | 30.38                         |

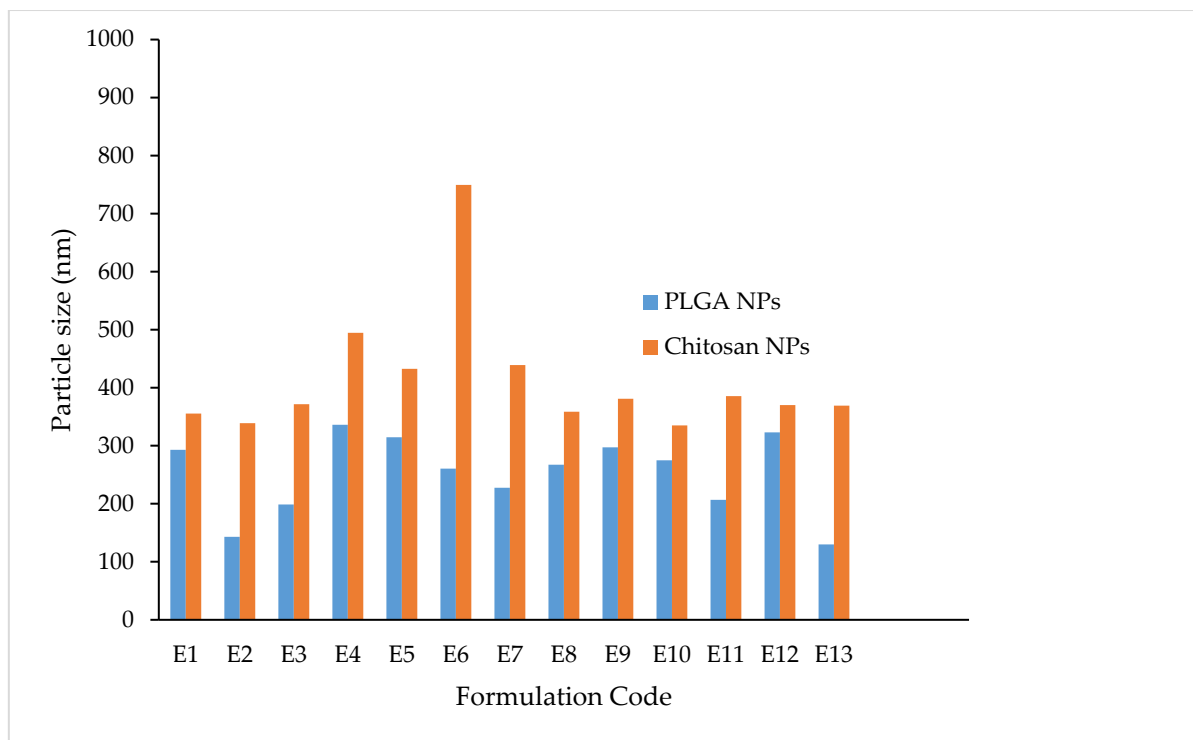

**Figure S1.** Comparison of particle size (nm) of PLGA NPs before and after coating with chitosan.

**Table S3.** Predicted experimental conditions for low particle size and high encapsulation efficiency for CS-PLGA nanoparticles.

| Response                   | Goal         | Lower                     | Target           | Upper                         | Weight                 | Importance             |
|----------------------------|--------------|---------------------------|------------------|-------------------------------|------------------------|------------------------|
| % Encapsulation Efficiency | Maximum      | 27.62                     | 57.79            |                               | 1                      | 1                      |
| Particle size (nm)         | Minimum      |                           | 257.70           | 819                           | 1                      | 1                      |
| Solution                   | PLGA (mg/mL) | Poloxamer % (w/v)         | Chitosan % (w/v) | %Encapsulation Efficiency Fit | Particle size (nm) Fit | Composite Desirability |
| 1                          | 3.70202      | 1                         | 1.51515          | 55.1770                       | 388.462                | 0.837021               |
| Response                   | Fit          | Standard Error of the Fit | 95% CI           | 95% PI                        |                        |                        |
| % Encapsulation Efficiency | 55.18        | 2.97                      | (48.98, 61.37)   | (40.85, 69.50)                |                        |                        |
| Particle size (nm)         | 388.5        | 46.7                      | (291.1, 485.8)   | (163.2, 613.7)                |                        |                        |

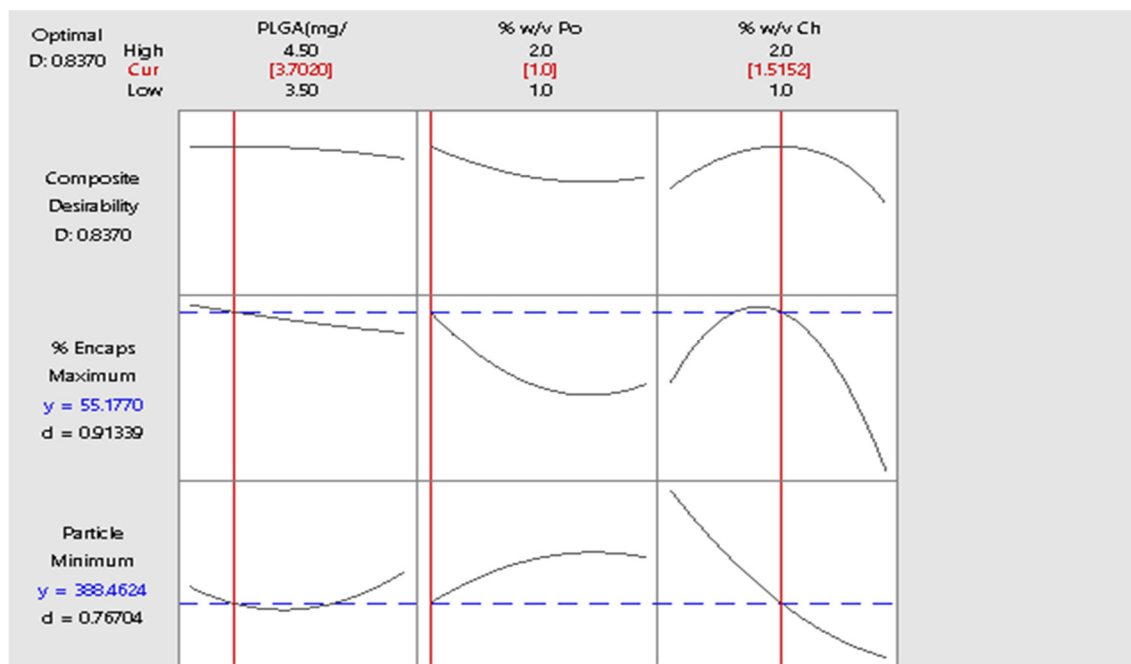

**Figure S2.** Response optimization parameters and predicted experimental conditions for low particle size and high encapsulation efficiency for CS-PLGA nanoparticles.

**Table S4.** Predicted experimental conditions for low particle size and + 25 mV zeta potential efficiency for CS-PLGA nanoparticles.

| Response            | Goal            | Lower                           | Target              | Upper                      | Weight                    | Importance                |
|---------------------|-----------------|---------------------------------|---------------------|----------------------------|---------------------------|---------------------------|
| Zeta Potential (mV) | +25             | -46.4                           | +25                 | +48                        | 1                         | 1                         |
| Particle Size (nm)  | Minimum         |                                 | 257.70              | 819                        | 1                         | 1                         |
| Solution            | PLGA<br>(mg/mL) | Poloxamer %<br>(w/v)            | Chitosan %<br>(w/v) | Zeta potential<br>(mV) Fit | Particle size<br>(nm) Fit | Composite<br>Desirability |
| 1                   | 4.49841         | 1                               | 1.31815             | 25.0000                    | 388.462                   | 1.00000                   |
| Response            | Fit             | Standard<br>Error of the<br>Fit | 95% CI              | 95% PI                     |                           |                           |
| Zeta Potential (mV) | 25.00           | 8.16                            | (7.97, 42.03)       | (-6.86, 56.86)             |                           |                           |
| Particle Size (nm)  | 388.5           | 46.7                            | (291.1, 485.8)      | (163.2, 613.7)             |                           |                           |

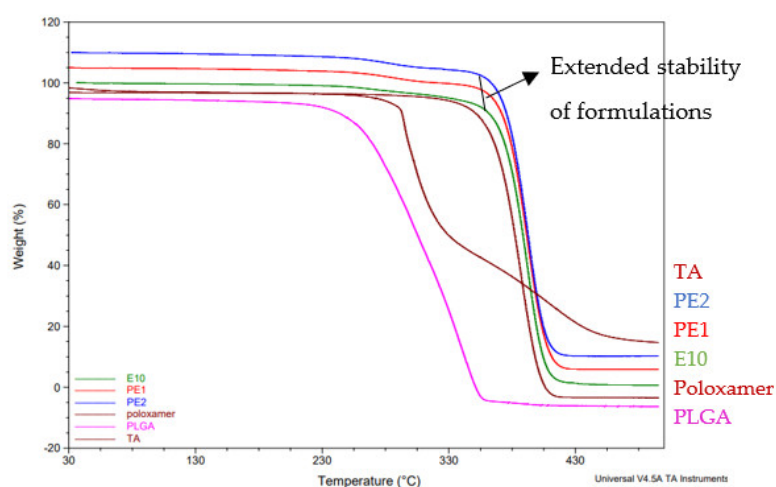

**Figure S3.** Thermal analysis of individual components and PLGA NPs (PE1, PE2 and E10).

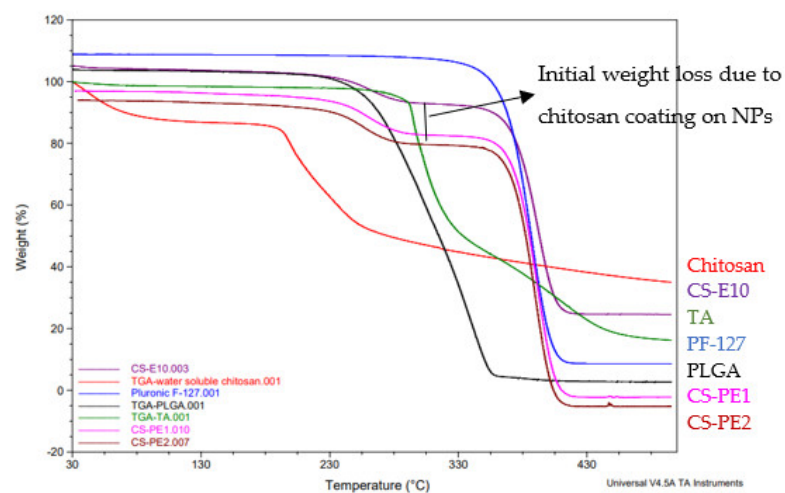

**Figure S4.** Thermal analysis of chitosan-coated NPs (CS-E10, CS-PE1 and CS-PE2) and the individual components using TGA.

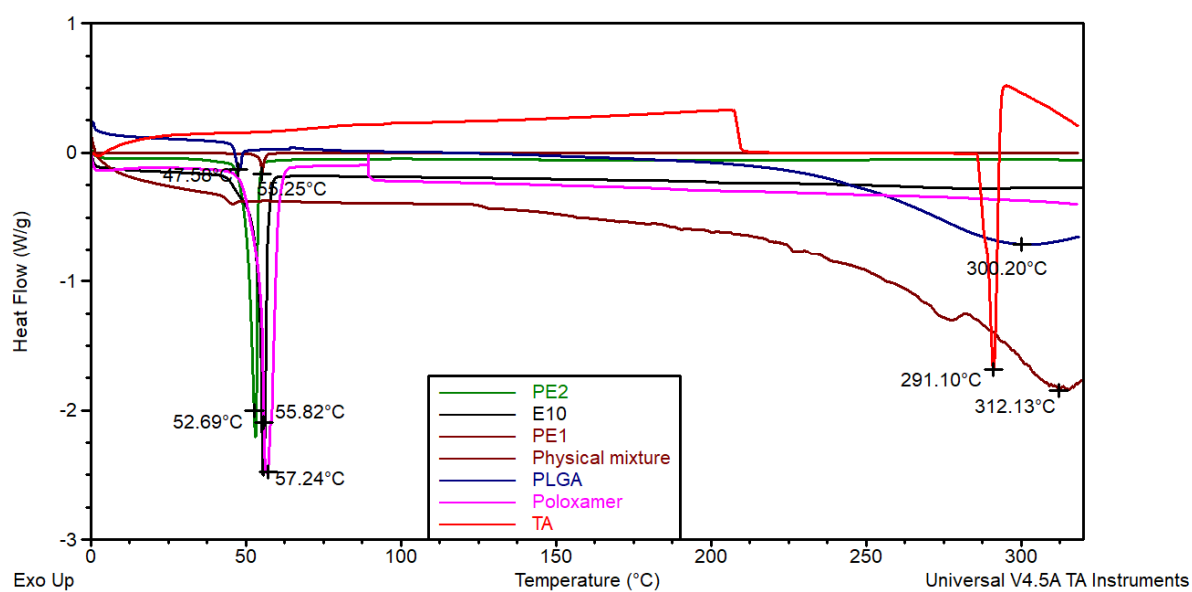

**Figure S5.** DSC thermograms of components and PLGA NPs (E10, PE1 and PE2).
